# Supplementary material
Source: Springer Nature journal article supplement (https://www.springermedizin.de/resource/supplementary/12889_2008_1698_MOESM2_ESM.pdf/9503754)

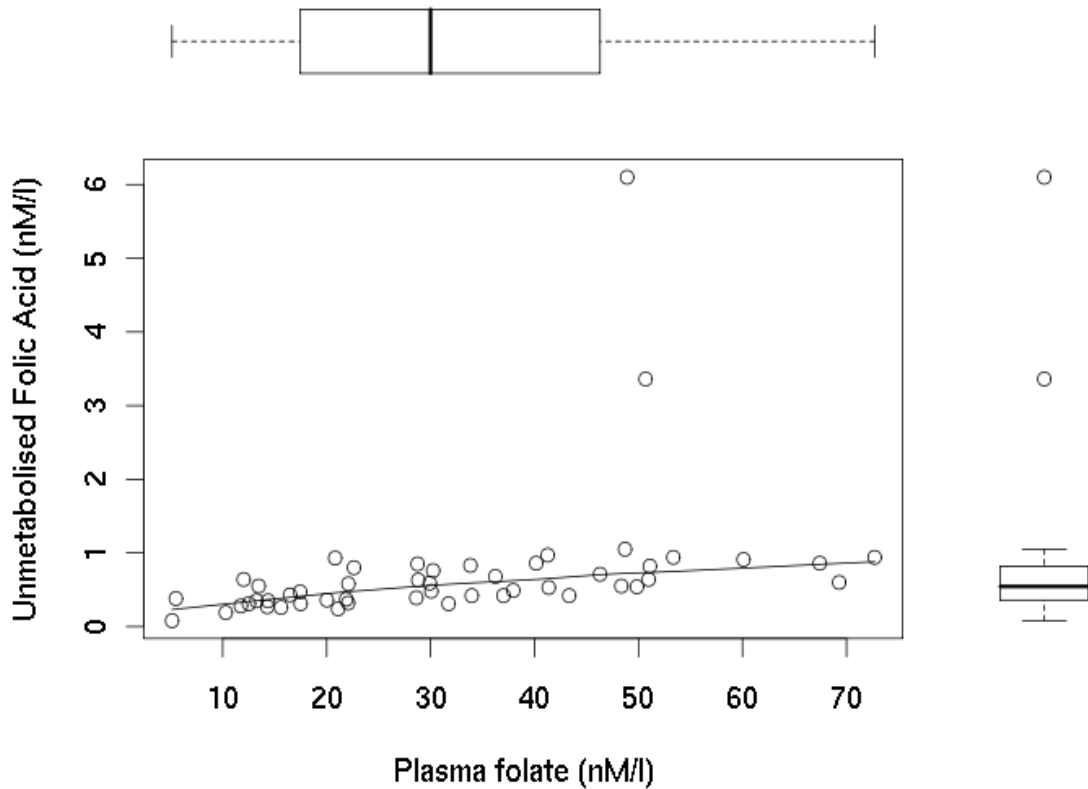

( $p = 0.011$ ,  $r^2 = 0.110$ )

Supplement: MOESM2 [file 9503754]
